# Supplementary material
Source: PubMed Central journal article supplement (PMC8319089)
Supplement: NIHMS1715539-supplement-Supplementary_materials__datasets__figure_explanation__extra_readings.pdf [file NIHMS1715539-supplement-Supplementary_materials__datasets__figure_explanation__extra_readings.pdf]

## Supplementary information

---

# The rise of affectivism

---

In the format provided by the  
authors and unedited

### **Supplementary Material Section**

- Dataset address
- R code directory
- Figure explanations
- Supplementary Reading List

A dataset was constructed for the figures and can be found at: <https://osf.io/2ktnv/>  
The relevant R code can be found at: <https://github.com/UH-CPL/Affectivism-Code>

## Figure 1b

### The relative increase of NIMH funding spent on research on emotion since 1985

Figure 1b shows the evolution of NIMH funding on emotion as a percentage of the overall NIMH budget on a yearly basis.

#### Methodology

The National Institute of Mental Health (NIMH) in the United States is the lead federal funding agency for psychology and psychiatry. It is one of the 27 agencies that make up the National Institutes of Health (NIH). Accordingly, NIMH, due to its size, prestige, and relevancy to affective and related research, provides an excellent basis for investigating research funding trends. Moreover, NIH is one of the very few research funding agencies world-wide that keeps detailed public records of its grants since 1985. This information is available through an online portal called NIH RePORTER.

From NIH RePORTER, we collected all the NIMH grant data from 1985 to 2018. Then we identified within the NIMH grants the subgroup of grants related to research on emotion as those that featured either in their title or abstract at least one of the following keywords: 'emotion', 'emotions', 'emote', 'emotive'. The figure illustrates the evolution of research funding on emotion as a percentage of overall NIMH funding on a yearly basis. Performing regression on this normalised time series confirms that funding of research on emotion experienced a significant increase as a portion of the overall NIMH budget (Pearson correlation,  $r = 0.260$ ,  $p < 0.001$ ). In fact, it doubled, starting from about 6% of the total budget in 1985 and reaching about 12% of the total budget in the late 2010s.

## Figure 1c

### The extent to which publications with considerable emotion content outgrew publications concerning behaviour without emotion content since 1980

Figure 1c shows the evolution of EM publications as percentage of the BBM category since 1980 (see below).

#### Methodology

The Medical Subject Headings (MeSH) thesaurus is a controlled and hierarchically organised vocabulary produced by the National Library of Medicine. It is used for indexing, cataloguing, and searching of biomedical and health-related information. MeSH includes the subject headings appearing in MEDLINE/PubMed, the NLM Catalog, and other NLM databases. (<https://www.nlm.nih.gov/mesh/meshhome.html>)

We used the MeSH category 'Behavior and Behavior Mechanisms' (BBM) to acquire through PubMed all the relevant publications since 1980. In this MeSH category, papers that typically featured considerable affective content fall largely under the branch 'Emotions' (EM). Behaviour papers with either non-affective or partly affective content fall largely under the other branches of the BBM category. We consider the EM group the forefront of affective scholarship.

We found in PubMed that between 1980 and 2018 104,563 EM publications appeared in the literature within a total of 1,449,758 BBM publications. To test if the growth in the number of EM publications is above and beyond the natural expansion of the science system the last 40 years, we computed the proportion of the EM publications each year with respect to the overall number of BBM publications that year. The figure shows the evolution of the EM proportion during the period of observation. The increase is not only statistically significant (Pearson correlation,  $r = 0.765$ ;  $p < 0.001$ ) but also materially impressive. The relative volume of publications with considerable affective content in behavioural research more or less doubled since 1980, increasing from ~4.5% in 1980 to ~9.2% in 2018.

## Figures 1d-g

### The increasing prominence of affect in research on cognitive mechanisms.

Figures 1d-1g present the evolution of emotion content as a percentage of the overall publications on memory, attention, perception, and decision-making.

#### Methodology

To investigate to what degree emotion methods and content pollinated other areas of scholarship in psychology, we selected four MeSH areas:

$$X = \{ \text{'Memory', 'Attention', 'Perception', 'Decision-making'} \}.$$

For each area  $X_i$ , we ran two queries in the PubMed database: Q1: ' $X_i$  and Emotion' and Q2: ' $X_i$ '. The first, joint query yielded those publications in subject area  $X_i$  that featured significant emotion content. The second, simple query yielded all the publications in  $X_i$ , that is, both those with and those without emotion content. The figure shows the growth of publications with considerable emotion content in each area  $X_i$  as a percentage of the total number of  $X_i$  publications each year.

Performing regression in all cases confirms the strong increase of the publications featuring significant emotion content in each area  $X_i$ , net of all other factors (Pearson correlation,  $r > 0.8$ ;  $p < 0.001$  in all cases). Depending on the case, this increase is between two-fold and ten-fold.

## Supplementary Reading List

Please note: No attempt has been made to ensure that this list is representative or balanced across disciplines, impact, time or theories. A more complete analysis and explanation of individual papers, books and events that led to the rise of the affectivism is currently underway as part of a complementary project.

Adolphs, R., Tranel, D., Damasio, H., & Damasio, A. (1994). Impaired recognition of emotion in facial expressions following bilateral damage to the human amygdala. *Nature*, 372(6507), 669-672. <https://doi.org/10.1038/372669a0>

Adolphs, R., Tranel, D., Damasio, H., & Damasio, A. R. (1995). Fear and the human amygdala. *Journal of Neuroscience*, 15(9), 5879-5891. <https://doi.org/10.1523/JNEUROSCI.15-09-05879.1995>

Aggleton, J. P. (Ed.). (2000). *The amygdala: A functional analysis*. Oxford University Press.

Armony, J., & Vuilleumier, P. (Eds.). (2013). *The Cambridge handbook of human affective neuroscience*. Cambridge University Press. <https://doi.org/10.1017/CBO9780511843716>

Arnold, M. B. (1970). *Feelings and emotions: The Loyola symposium*. Academic Press.

Bally, C. (1913). *Le langage et la vie* [Language and life] (1st ed.). Payot.

Barclay, K. (2020). *The history of emotions: A student guide to methods and sources* (1st ed.). Red Globe Press.

Barrett, L. F. (2006). Are emotions natural kinds? *Perspectives on Psychological Science*, 1(1), 28-58. <https://doi.org/10.1111/j.1745-6916.2006.00003.x>

Barrett, L. F., Lewis, M., & Haviland, J. (Eds.). (2016). *Handbook of emotions* (4th ed.). Guilford Press.

Barrett, L. F., & Russell, J. A. (Eds.). (2014). *The psychological construction of emotion*. Guilford Press.

Battigalli, P., & Dufwenberg, M. (2007). Guilt in games. *American Economic Review*, 97(2), 170-176. <https://doi.org/10.1257/aer.97.2.170>

Beatty, A. (2013). Current emotion research in anthropology: Reporting the field. *Emotion Review*, 5(4), 414-422. <https://doi.org/10.1177/1754073913490045>

Beatty, A. (2019). *Emotional worlds: Beyond an anthropology of emotion*. Cambridge University Press.

Bechara, A., Tranel, D., Damasio, H., Adolphs, R., Rockland, C., & Damasio, A. R. (1995). Double dissociation of conditioning and declarative knowledge relative to the amygdala

- and hippocampus in humans. *Science*, 269(5227), 1115-1118.  
<https://doi.org/10.1126/science.7652558>
- Bens, J., Diefenbach, A., John, T., Kahl, A., Lehmann, H., Lüthjohann, M... & Ragip Zik, M. (2019). *The politics of affective societies: An interdisciplinary essay*. Emotionskulturen 7. Transcript Verlag.
- Berkowitz, L. (1990). On the formation and regulation of anger and aggression: A cognitive-neoassociationistic analysis. *American Psychologist* 45(4), 494-503.  
<https://doi.org/10.1037//0003-066x.45.4.494>
- Berridge, K. C., & Robinson, T. E. (1998). What is the role of dopamine in reward: Hedonic impact, reward learning, or incentive salience? *Brain Research Reviews*, 28(3), 309-369. [https://doi.org/10.1016/S0165-0173\(98\)00019-8](https://doi.org/10.1016/S0165-0173(98)00019-8)
- Berridge, K. C., & Robinson, T. E. (2003). Parsing reward. *Trends in Neurosciences*, 26(9), 507-513. [https://doi.org/10.1016/S0166-2236\(03\)00233-9](https://doi.org/10.1016/S0166-2236(03)00233-9)
- Blakemore, D. (2011). On the descriptive ineffability of expressive meaning. *Journal of Pragmatics*, 43(14), 3537-3550. <https://doi.org/10.1016/j.pragma.2011.08.003>
- Boddice, R. (2014). The affective turn: Historicising the emotions. In C. Tileaga & J. Byford (Eds.), *Psychology and history: Interdisciplinary explorations* (pp. 147-165). Cambridge University Press.
- Bower, G. H. (1981). Mood and memory. *American Psychologist*, 36(2), 129-148.  
<https://doi.org/10.1037//0003-066x.36.2.129>
- Brader, T. (2005). Striking a responsive chord: How political ads motivate and persuade voters by appealing to emotions. *American Journal of Political Science*, 49(2), 388-405.  
<https://doi.org/10.1111/j.0092-5853.2005.00130.x>
- Broomhall, S., Davidson, J., & Lynch, A. (Eds). (2019). *A cultural history of the emotions*. 6 volumes (1st ed.). Bloomsbury Academic.
- Brosch, T. (2021). Affect and emotions as drivers of climate change perception and action: A review. *Current Opinion in Behavioral Sciences*, 42, 15-21.  
<https://doi.org/10.1016/j.cobeha.2021.02.001>
- Bush, G., Luu, P., & Posner, M. I. (2000). Cognitive and emotional influences in anterior cingulate cortex. *Trends in Cognitive Sciences*, 4(6), 215-222.  
[https://doi.org/10.1016/s1364-6613\(00\)01483-2](https://doi.org/10.1016/s1364-6613(00)01483-2)
- Cacioppo, J. T., & Berntson, G. G. (1994). Relationship between attitudes and evaluative space: A critical review, with emphasis on the separability of positive and negative

- substrates. *Psychological Bulletin*, 115(3), 401-423. <https://doi.org/10.1037/0033-2909.115.3.401>
- Cairns, D. L. (1993). *Aidos: The psychology and ethics of honour and shame in ancient greek literature* (1st ed.). Clarendon Press.
- Calder, A. J., Lawrence, A. D., & Young, A. W. (2001). Neuropsychology of fear and loathing. *Nature Reviews Neuroscience*, 2(5), 352-363. <https://doi.org/10.1038/35072584>
- Calvo, R. A., D'Mello, S., Gratch, J., & Kappas, A. (Eds.). (2015). *The Oxford handbook of affective computing*. Oxford University Press.
- Cambria, E. (2016). Affective computing and sentiment analysis. *Ieee Intelligent Systems*, 31(2), 102-107. <https://doi.org/10.1109/Mis.2016.31>
- Campos, J. J., Frankel, C. B., & Camras, L. (2004). On the nature of emotion regulation. *Child Development*, 75(2), 377-394. <https://doi.org/10.1111/j.1467-8624.2004.00681.x>
- Campos, J. J., Mumme, D. L., Kermoian, R., & Campos, R. G. (1994). A functionalist perspective on the nature of emotion. *Monographs of the Society for Research in Child Development*, 59(2-3), 284-303. <https://doi.org/10.2307/1166150>
- Camras, L. A., & Allison, K. (1985). Children's understanding of emotional facial expressions and verbal labels. *Journal of Nonverbal Behavior*, 9(2), 84-94. <https://doi.org/10.1007/Bf00987140>
- Cannon, W. B. (1927). The James-Lange theory of emotions: A critical examination and an alternative theory. *American Journal of Psychology*, 39, 106-124. <https://doi.org/10.2307/1415404>
- Cannon, W. B. (1929). *Bodily changes in pain, hunger, fear and rage: An account of recent research into the function of emotional excitement* (2nd ed.). Appleton-Century-Crofts.
- Carvalho, G. and Damasio, A. (2021). Interoception and the Origin of Feelings: A New Synthesis, *BioEssays*, <https://doi.org/10.1002/bies.202000261>
- Carver, C. S., & Scheier, M. F. (1998). *On the self-regulation of behavior*. Cambridge University Press. <https://doi.org/10.1017/CBO9781139174794>
- Chen, X. Y., Cen, G. Z., Li, D., & He, Y. F. (2005). Social functioning and adjustment in Chinese children: The imprint of historical time. *Child Development*, 76(1), 182-195. <https://doi.org/10.1111/j.1467-8624.2005.00838.x>
- Coan, J. A., & Allen, J. J. (Eds.). (2007). *Handbook of emotion elicitation and assessment*. Oxford University Press.

- Cochrane, T., Fantini, B., & Scherer, K. R. (Eds.). (2013). *The emotional power of music: Multidisciplinary perspectives on musical arousal, expression, and social control*. Oxford University Press.
- Cohn, A., Engelmann, J., Fehr, E., & Marechal, M. A. (2015). Evidence for countercyclical risk aversion: An experiment with financial professionals. *American Economic Review*, *105*(2), 860-885. <https://doi.org/10.1257/aer.20131314>
- Cole, P. M. (1986). Children's spontaneous control of facial expression. *Child Development*, *57*(6), 1309-1321. <https://doi.org/10.1111/j.1467-8624.1986.tb00459.x>
- Cole, P. M., Tamang, B. L., & Shrestha, S. (2006). Cultural variations in the socialization of young children's anger and shame. *Child Development*, *77*(5), 1237-1251. <https://doi.org/10.1111/j.1467-8624.2006.00931.x>
- Craig, A. D. (2002). How do you feel? Interoception: The sense of the physiological condition of the body. *Nature Reviews Neuroscience*, *3*(8), 655-666. <https://doi.org/10.1038/nrn894>
- Critchley, H. D., Wiens, S., Rotshtein, P., Ohman, A., & Dolan, R. J. (2004). Neural systems supporting interoceptive awareness. *Nature Neuroscience*, *7*(2), 189-195. <https://doi.org/10.1038/nn1176>
- Crone, E. A., & Dahl, R. E. (2012). Understanding adolescence as a period of social-affective engagement and goal flexibility. *Nature Reviews Neuroscience*, *13*(9), 636-650. <https://doi.org/10.1038/nrn3313>
- Cryder, C. E., Lerner, J. S., Gross, J. J., & Dahl, R. E. (2008). Misery is not miserly: Sad and self-focused individuals spend more. *Psychological Science*, *19*(6), 525-530. <https://doi.org/10.1111/j.1467-9280.2008.02118.x>
- Cunningham, W. A., Van Bavel, J. J., & Johnsen, I. R. (2008). Affective flexibility: Evaluative processing goals shape amygdala activity. *Psychological Science*, *19*(2), 152-160. <https://doi.org/10.1111/j.1467-9280.2008.02061.x>
- D'Arms, J., & Jacobson, D. (2000). The moralistic fallacy: On the 'appropriateness' of emotions (Ethics, propriety, correctness). *Philosophy and Phenomenological Research*, *61*(1), 65-90. <https://doi.org/10.2307/2653403>
- Dahl, A., Campos, J. J., Anderson, D. I., Uchiyama, I., Witherington, D. C., Ueno, M., Poutrain-Lejeune, L., & Barbu-Roth, M. (2013). The epigenesis of wariness of heights. *Psychological Science*, *24*(7), 1361-1367. <https://doi.org/10.1177/0956797613476047>
- Dalgleish, T., & Power, M. J. (Eds.). (1999). *Handbook of cognition and emotion*. John Wiley & Sons Ltd.



- Damasio, A. R. (1994). *Descartes' error: Emotion, reason and the human brain*. Vintage.
- Damasio, A. (1999). *The feeling of what happens: Body and emotion in the making of consciousness* (1st ed.). Houghton Mifflin Harcourt.
- Damasio, A. (2020). Feeling & Knowing: Making Minds Conscious. *Cognitive Neuroscience*, 12(2), 85-66. <https://doi.org/10.1080/17588928.2020.1846027>.
- Damasio, A. (2003). *Looking for Spinoza: Joy, sorrow and the feeling brain* (1st ed.). Houghton Mifflin Harcourt.
- Damasio, A. (2019). *The strange order of things: Life, feeling, and the making of cultures*. Penguin Random House.
- Damasio, A., & Carvalho, G. B. (2013). The nature of feelings: Evolutionary and neurobiological origins. *Nature Reviews Neuroscience*, 14(2), 143-152. <https://doi.org/10.1038/nrn3403>
- Damasio, H., Grabowski, T., Frank, R., Galaburda, A. M., & Damasio, A. R. (1994). The return of Phineas Gage: Clues about the brain from the skull of a famous patient. *Science*, 264(5162), 1102-1105. <https://doi.org/10.1126/science.8178168>
- Darwin, C. (1872). *The expression of the emotions in man and animals*. John Murray. <https://doi.org/10.1037/10001-000>
- Davidson, R. J., & Irwin, W. (1999). The functional neuroanatomy of emotion and affective style. *Trends in Cognitive Sciences*, 3(1), 11-21. [https://doi.org/10.1016/s1364-6613\(98\)01265-0](https://doi.org/10.1016/s1364-6613(98)01265-0)
- Davidson, R. J., Jackson, D. C., & Kalin, N. H. (2000). Emotion, plasticity, context, and regulation: Perspectives from affective neuroscience. *Psychological Bulletin*, 126(6), 890-909. <https://doi.org/10.1037//0033-2909.126.6.890>
- Davidson, R. J., Scherer, K. R., & Goldsmith, H. H. (Eds.). (2003). *Handbook of affective sciences*. Oxford University Press.
- Davidson, R. J., & Sutton, S. K. (1995). Affective neuroscience: the emergence of a discipline. *Current Opinion in Neurobiology*, 5(2), 217-224. [https://doi.org/10.1016/0959-4388\(95\)80029-8](https://doi.org/10.1016/0959-4388(95)80029-8)
- Davis, M., & Whalen, P. J. (2001). The amygdala: vigilance and emotion. *Molecular Psychiatry*, 6(1), 13-34. <https://doi.org/10.1038/sj.mp.4000812>
- De Gelder, B. (2016). *Emotions and the body*. Oxford University Press.

- De Sousa, R. (1987). *The rationality of emotion*. MIT Press.
- Deigh, J. (1994). Cognitivism in the theory of emotions. *Ethics*, 104(4), 824-854.  
<https://doi.org/10.1086/293657>
- Deigh, J. (2008). *Emotions, values, and the law* (1st ed.). Oxford University Press.
- Denham, S. A. (1998). *Emotional development in young children*. Guilford Press.
- Deonna, J., & Teroni, F. (2012). *The emotions: A philosophical introduction* (1st ed.). Routledge.
- Descartes, R. (1990). *Les passions de l'âme* [The passions of the soul]. Le Livre de Poche. (Original work published in 1649)
- Dewey, J. (1895). The theory of emotion. *Psychological Review*, 2(1), 13-32.  
<https://doi.org/10.1037/h0070927>
- Dezecache, G., Mercier, H., & Scott-Phillips, T. C. (2013). An evolutionary approach to emotional communication. *Journal of Pragmatics*, 59, 221-233.  
<https://doi.org/10.1016/j.pragma.2013.06.007>
- Diener, E., Oishi, S., & Lucas, R. E. (2003). Personality, culture, and subjective well-being: emotional and cognitive evaluations of life. *Annual Review of Psychology*, 54, 403-425.  
<https://doi.org/10.1146/annurev.psych.54.101601.145056>
- Dolan, R. J. (2002). Emotion, cognition, and behavior. *Science*, 298(5596), 1191-1194.  
<https://doi.org/10.1126/science.1076358>
- Dorison, C. A., Wang, K., Rees, V. W., Kawachi, I., Ericson, K. M. M., & Lerner, J. S. (2020). Sadness, but not all negative emotions, heightens addictive substance use. *Proceedings of the National Academy of Sciences of the United States of America*, 117(2), 943-949. <https://doi.org/10.1073/pnas.1909888116>
- Drevets, W. C., Price, J. L., Simpson, J. R., Todd, R. D., Reich, T., Vannier, M., & Raichle, M. E. (1997). Subgenual prefrontal cortex abnormalities in mood disorders. *Nature*, 386(6627), 824-827. <https://doi.org/10.1038/386824a0>
- Duffy, E. (1941). An explanation of "emotional" phenomena without the use of the concept "emotion". *The Journal of General Psychology*, 25(2), 283-293.  
<https://doi.org/10.1080/00221309.1941.10544400>
- Dukes, D., & Clément, F. (Eds.). (2019). *Foundations of affective social learning: Conceptualizing the social transmission of value*. Cambridge University Press.  
<https://doi.org/10.1017/9781108661362>

- Dukes, D., Samson, A. C., & Walle, E. (Eds.). (Forthcoming). *The Oxford handbook of emotional development*. Oxford University Press.
- Eid, M., & Diener, E. (2001). Norms for experiencing emotions in different cultures: inter- and intranational differences. *Journal of Personality and Social Psychology*, 81(5), 869-885. <https://doi.org/10.1037//0022-3514.81.5.869>
- Eisenberg, N. (2000). Emotion, regulation, and moral development. *Annual Review of Psychology*, 51, 665-697. <https://doi.org/10.1146/annurev.psych.51.1.665>
- Eisenberg, N., Cumberland, A., & Spinrad, T. L. (1998). Parental socialization of emotion. *Psychological Inquiry*, 9(4), 241-273. [https://doi.org/10.1207/s15327965pli0904\\_1](https://doi.org/10.1207/s15327965pli0904_1)
- Eisenberg, N., & Miller, P. A. (1987). The relation of empathy to prosocial and related behaviors. *Psychological Bulletin*, 101(1), 91-119. <https://doi.org/10.1037/0033-2909.101.1.91>
- Ekman, P. (1973). *Darwin and facial expression: A century of research in review*. Academic Press.
- Ekman, P., & Friesen, W.V. (1978). *Facial action coding system*. Consulting Psychologist Press.
- Ekman, P. (1992). An argument for basic emotions. *Cognition & Emotion*, 6(3-4), 169-200. <https://doi.org/10.1080/02699939208411068>
- Ekman, P. (2003). Emotions inside out. 130 years after Darwin's "The expression of the emotions in man and animal". In P. Ekman, J. J. Campos, R. J. Davidson, & F. B. M. DeWaal (Eds.), *Emotions inside out: 130 Years after Darwin's the Expression of the Emotions in Man and Animals* (Vol. 1000, pp. 1-6). <https://doi.org/10.1196/annals.1280.002>
- El Ayadi, M., Kamel, M. S., & Karray, F. (2011). Survey on speech emotion recognition: Features, classification schemes, and databases. *Pattern Recognition*, 44(3), 572-587. <https://doi.org/10.1016/j.patcog.2010.09.020>
- Elfenbein, H. A., & Ambady, N. (2002). On the universality and cultural specificity of emotion recognition: A meta-analysis. *Psychological Bulletin*, 128(2), 203-235. <https://doi.org/10.1037/0033-2909.128.2.203>
- Elfenbein, H. A., & Ambady, N. (2003). When familiarity breeds accuracy: Cultural exposure and facial emotion recognition. *Journal of Personality and Social Psychology*, 85(2), 276-290. <https://doi.org/10.1037/0022-3514.85.2.276>

- Elster, J. (1998). Emotions and economic theory. *Journal of Economic Literature*, 36(1), 47-74. <https://www.jstor.org/stable/2564951>
- Elster, J. (1998). *Alchemies of the mind: Rationality and the emotions*. Cambridge University Press.
- Fehr, B., & Russell, J. A. (1984). Concept of emotion viewed from a prototype perspective. *Journal of Experimental Psychology-General*, 113(3), 464-486. <https://doi.org/10.1037/0096-3445.113.3.464>
- Fehr, E., & Gächter, S. (2002). Altruistic punishment in humans. *Nature*, 415(6868), 137-140. <https://doi.org/10.1038/415137a>
- Feinstein, J. S., Adolphs, R., Damasio, A., & Tranel, D. (2011). The human amygdala and the induction and experience of fear. *Current Biology*, 21(1), 34-38. <https://doi.org/10.1016/j.cub.2010.11.042>
- Fischer, A. H., Rodriguez Mosquera, P. M., van Vianen, A. E., & Manstead, A. S. (2004). Gender and culture differences in emotion. *Emotion*, 4(1), 87-94. <https://doi.org/10.1037/1528-3542.4.1.87>
- Fischer, K. W., Shaver, P. R., & Carnochan, P. (1990). How emotions develop and how they organise development. *Cognition and Emotion*, 4(2), 81-127. <https://doi.org/10.1080/02699939008407142>
- Fleig, A., & von Scheve, C. (Eds.). (2019). *Public spheres of resonance: Constellations of affect and language*. Routledge.
- Fontaine, J. R., Scherer, K. R., & Soriano, C. (Eds.). (2013). *Components of emotional meaning: A sourcebook*. Oxford University Press.
- Foolen, A. (2016). Expressives. In N. Riemer (Ed.), *The Routledge handbook of semantics* (pp. 473-490). Routledge.
- Forgas, J. P. (1995). Mood and judgment: The affect infusion model (AIM). *Psychological Bulletin*, 117(1), 39-66. <https://doi.org/10.1037/0033-2909.117.1.39>
- Forgas, J. P. (2008). Affect and cognition. *Perspectives on Psychological Science*, 3(2), 94-101. <https://doi.org/10.1111/j.1745-6916.2008.00067.x>
- Fox, A. S., Lapate, R. C., Shackman, A. J., & Davidson, R. J. (Eds.). (2018). *The nature of emotion: Fundamental questions* (2nd ed.). Oxford University Press.
- Fox, M. D., Snyder, A. Z., Vincent, J. L., Corbetta, M., Van Essen, D. C., & Raichle, M. E. (2005). The human brain is intrinsically organized into dynamic, anticorrelated functional

- networks. *Proceedings of the National Academy of Sciences of the United States of America*, 102(27), 9673-9678. <https://doi.org/10.1073/pnas.0504136102>
- Frank, R. H. (1998). *Passions within reason: The strategic role of the emotions*. W. W. Norton & Co.
- Fredrickson, B. L. (2001). The role of positive emotions in positive psychology: The broaden-and-build theory of positive emotions. *American Psychologist*, 56(3), 218-226. <https://doi.org/10.1037//0003-066x.56.3.218>
- Fredrickson, B. L., & Branigan, C. (2005). Positive emotions broaden the scope of attention and thought-action repertoires. *Cognition and Emotion*, 19(3), 313-332. <https://doi.org/10.1080/02699930441000238>
- Frijda, N. H. (1986). *The emotions*. Cambridge University Press.
- Frijda, N. H. (2005). Emotion experience. *Cognition and Emotion*, 19(4), 473-497. <https://doi.org/10.1080/02699930441000346>
- Frijda, N. H. (2007). *The laws of emotion*. Lawrence Erlbaum Associates.
- Gardiner, H. N., Metcalf, R. C., & Beebe-Center, J. G. (1937). *Feeling and emotion: A history of theories*. American Book Company.
- Gendolla, G. H. (2000). On the impact of mood on behavior: An integrative theory and a review. *Review of General Psychology*, 4(4), 378-408. <https://doi.org/10.1037/1089-2680.4.4.378>
- Gendolla, G. H. E., & Richter, M. (2010). Effort mobilization when the self is involved: Some lessons from the cardiovascular system. *Review of General Psychology*, 14(3), 212-226. <https://doi.org/10.1037/a0019742>
- Gendron, M., & Barrett, L. F. (2009). Reconstructing the past: A century of ideas about emotion in psychology. *Emotion Review*, 1(4), 316-339. <https://doi.org/10.1177/1754073909338877>
- George, J. M. (2000). Emotions and leadership: The role of emotional intelligence. *Human Relations*, 53(8), 1027-1055. <https://doi.org/10.1177/0018726700538001>
- Gergely, G., & Watson, J. S. (1996). The social biofeedback theory of parental affect-mirroring: The development of emotional self-awareness and self-control in infancy. *International Journal of Psychoanalysis*, 77, 1181-1212. <https://www.pep-web.org/document.php?id=ijp.077.1181a>
- Goldie, P. (Ed.). (2009). *The Oxford handbook of philosophy of emotion*. Oxford University Press.

- Gneezy, U., & Imas, A. (2014). Materazzi effect and the strategic use of anger in competitive interactions. *Proceedings of the National Academy of Sciences of the United States of America*, 111(4), 1334-1337. <https://doi.org/10.1073/pnas.1313789111>
- Grandjean, D., & Scherer, K. R. (2008). Unpacking the cognitive architecture of emotion processes. *Emotion*, 8(3), 341-351. <https://doi.org/10.1037/1528-3542.8.3.341>
- Gratch, J., & Marsella, S. (Eds.). (2013). *Social emotions in nature and artifact*. Oxford University Press.
- Gray, J. A. (1987). *The psychology of fear and stress*. Cambridge University Press.
- Greenberg, L., & Goldman, R. (2018). *Clinical handbook of emotion focused therapy*. American Psychological Association.
- Greene, J. D., Sommerville, R. B., Nystrom, L. E., Darley, J. M., & Cohen, J. D. (2001). An fMRI investigation of emotional engagement in moral judgment. *Science*, 293(5537), 2105-2108. <https://doi.org/10.1126/science.1062872>
- Gross, J. J. (1998). The emerging field of emotion regulation: An integrative review. *Review of General Psychology*, 2(3), 271-299. <https://doi.org/10.1037/1089-2680.2.3.271>
- Gross, J. J. (2015). Emotion regulation: Current status and future prospects. *Psychological Inquiry*, 26(1), 1-26. <https://doi.org/10.1080/1047840x.2014.940781>
- Gross, J. J. (Ed.). (2015). *Handbook of emotion regulation* (2nd ed.). Guilford.
- Gross, J. J., & Barrett, L. F. (2013). The emerging field of emotion regulation: An integrative review. *Emotion*, 13(6), 997-998. <https://doi.org/10.1037/a0034512>
- Gross, J. J., & John, O. P. (2003). Individual differences in two emotion regulation processes: Implications for affect, relationships, and well-being. *Journal of Personality and Social Psychology*, 85(2), 348-362. <https://doi.org/10.1037/0022-3514.85.2.348>
- Gross, J. J., Levenson, R. W., & Mendes, W. B. (2020). Affective science. *Affective Science*, 1, 1-3.
- Haber, S. N., & Knutson, B. (2010). The reward circuit: Linking primate anatomy and human imaging. *Neuropsychopharmacology*, 35(1), 4-26. <https://doi.org/10.1038/npp.2009.129>
- Haidt, J., & Bjorklund, F. (2008). Social intuitionists answer six questions about moral psychology. In W. Sinnott-Armstrong (Ed.), *Moral psychology, volume 2: The cognitive science of morality: Intuition and diversity* (Vol. 2, pp. 181-217). MIT Press.

- Haidt, J., & Hersh, M. A. (2001). Sexual morality: The cultures and emotions of conservatives and liberals. *Journal of Applied Social Psychology, 31*(1), 191-221. <https://doi.org/10.1111/j.1559-1816.2001.tb02489.x>
- Hair, N. L., Hanson, J. L., Wolfe, B. L., & Pollak, S. D. (2015). Association of child poverty, brain development, and academic achievement. *Jama Pediatrics, 169*(9), 822-829. <https://doi.org/10.1001/jamapediatrics.2015.1475>
- Halberstadt, A. G., Denham, S. A., & Dunsmore, J. C. (2001). Affective social competence. *Social Development, 10*(1), 79-119. <https://doi.org/10.1111/1467-9507.00150>
- Halberstadt, A. G., & Lozada, F. T. (2011). Emotion development in infancy through the lens of culture. *Emotion Review, 3*(2), 158-168. <https://doi.org/10.1177/1754073910387946>
- Halperin, E. (2016). *Emotions in conflict: Inhibitors and facilitators of peace making*. Routledge.
- Hamann, S. B., Stefanacci, L., Squire, L. R., Adolphs, R., Tranel, D., Damasio, H., & Damasio, A. (1996). Recognizing facial emotion. *Nature, 379*(6565), 497-497. <https://doi.org/10.1038/379497a0>
- Harmon-Jones, E. (2003). Anger and the behavioral approach system. *Personality and Individual Differences, 35*(5), 995-1005. [https://doi.org/10.1016/s0191-8869\(02\)00313-6](https://doi.org/10.1016/s0191-8869(02)00313-6)
- Harris, P. L. (1989). *Children and emotion: The development of psychological understanding*. Basil Blackwell.
- Harris, P. L. (2012). *Trusting what you're told: How children learn from others*. Harvard University Press.
- Harris, W. V. (2004). *Restraining rage: The ideology of anger control in classical antiquity*. Harvard University Press.
- Hochschild, A. R. (1979). Emotion work, feeling rules, and social-structure. *American Journal of Sociology, 85*(3), 551-575. <https://doi.org/10.1086/227049>
- Huppes-Cluysenaer, L., & Coelho, N. M. M. S. (Eds.). (2018). *Aristotle on emotions in law and politics*. Springer International.
- Izard, C. E. (1971). *The face of emotion*. Appleton-Century-Crofts.
- Izard, C. E. (2007). Basic emotions, natural kinds, emotion schemas, and a new paradigm. *Perspectives on Psychological Science, 2*(3), 260-280. <https://doi.org/10.1111/j.1745-6916.2007.00044.x>
- Jack, R. E., Garrod, O. G., Yu, H., Caldara, R., & Schyns, P. G. (2012). Facial expressions of emotion are not culturally universal. *Proceedings of the National Academy of Sciences*

of the United States of America, 109(19), 7241-7244.  
<https://doi.org/10.1073/pnas.1200155109>

Jackson, J. C., Watts, J., Henry, T. R., List, J. M., Forkel, R., Mucha, P. J., Greenhill, S. J., Gray, R. D., & Lindquist, K. A. (2019). Emotion semantics show both cultural variation and universal structure. *Science*, 366(6472), 1517-1522.  
<https://doi.org/10.1126/science.aaw8160>

James, W. (1884). What is an emotion? *Mind*, 9(34), 188-205. <https://cutt.ly/EkPcgMp>

James, W. (1890). *The principles of psychology*. Dover Publications.

James, W. (1894). The physical basis of emotion. *Psychological Review*, 101(2), 205-210.  
<https://doi.org/10.1037/0033-295X.101.2.205>

Jasper, J. M. (1998). The emotions of protest: Affective and reactive emotions in and around social movements. *Sociological Forum*, 13(3), 397-424.  
<https://doi.org/10.1023/A:1022175308081>

Juslin, P. N., & Sloboda, J. A. (Eds.). (2010). *Handbook of music and emotion*. Oxford University Press.

Kagan, J. (1989). *Unstable ideas: Temperament, cognition, and self*. Harvard University Press.

Kagan, J. (2018). *Galen's prophecy: Temperament in human nature*. Routledge.

Kagan, J., Reznick, J. S., & Snidman, N. (1988). Biological bases of childhood shyness. *Science*, 240(4849), 167-171. <https://doi.org/10.1126/science.3353713>

Kahl, A. (Ed.) (2019) *Analyzing Affective Societies. Methods and Methodologies*. Routledge.

Kasmani, O., & Mattes, D. (2020). Traversing Fields: Affective Continuities across Muslim and Christian Settings in Berlin. *Social Analysis*, 64(1), 111-117.  
<https://doi.org/10.3167/sa.2020.640107>

Kaster, R. A. (2007). *Emotion, restraint, and community in ancient Rome* (1st ed.). Oxford University Press.

Keltner, D., & Lerner, J. S. (2010). Emotion. In D. T. Gilbert, S. T. Fiske, & G. Lindzey (Eds.), *The handbook of social psychology* (5th ed., Vol. 1, pp. 317-352). Wiley.  
<https://doi.org/10.1002/9780470561119.socpsy001009>

Kitayama, S., Mesquita, B., & Karasawa, M. (2006). Cultural affordances and emotional experience: socially engaging and disengaging emotions in Japan and the United



- States. *Journal of Personality and Social Psychology*, 91(5), 890-903. <https://doi.org/10.1037/0022-3514.91.5.890>
- Klüver, H., & Bucy, P. C. (1937). "Psychic blindness" and other symptoms following bilateral temporal lobectomy in Rhesus monkeys. *American Journal of Physiology*, 119, 352–353. <https://psycnet.apa.org/record/1938-00651-001>
- Knutson, B., & Greer, S. M. (2008). Anticipatory affect: Neural correlates and consequences for choice. *Philosophical Transactions of the Royal Society B-Biological Sciences*, 363(1511), 3771-3786. <https://doi.org/10.1098/rstb.2008.0155>
- Knutson, B., Taylor, J., Kaufman, M., Peterson, R., & Glover, G. (2005). Distributed neural representation of expected value. *Journal of Neuroscience*, 25(19), 4806-4812. <https://doi.org/10.1523/jneurosci.0642-05.2005>
- Konstan, D. (2006). *The emotions of the ancient Greeks: Studies in Aristotle and classical literature*. University of Toronto Press.
- Kosslyn, S. M., & Koenig, O. (1992). *Wet mind, the new cognitive neuroscience*. Free Press.
- Kövecses, Z. (2005). *Metaphor in culture: Universality and variation*. Cambridge University Press.
- Kreibig, S. D. (2010). Autonomic nervous system activity in emotion: A review. *Biological Psychology*, 84(3), 394-421. <https://doi.org/10.1016/j.biopsycho.2010.03.010>
- Kret, M. E., Massen, J., & Bliss-Moreau, E. (2021). Special issue: Building a truly comparative affective science. *Neuroscience and Biobehavioral Reviews*. <https://www.sciencedirect.com/journal/neuroscience-and-biobehavioral-reviews/special-issue/10Q4N0GFXM7>
- Kringelbach, M. L., & Berridge, K. C. (2009). Towards a functional neuroanatomy of pleasure and happiness. *Trends in Cognitive Sciences*, 13(11), 479-487. <https://doi.org/10.1016/j.tics.2009.08.006>
- LaBar, K. S., & Cabeza, R. (2006). Cognitive neuroscience of emotional memory. *Nature Reviews Neuroscience*, 7(1), 54-64. <https://doi.org/10.1038/nrn1825>
- LaBar, K. S., Gatenby, J. C., Gore, J. C., LeDoux, J. E., & Phelps, E. A. (1998). Human amygdala activation during conditioned fear acquisition and extinction: A mixed-trial fMRI study. *Neuron*, 20(5), 937-945. [https://doi.org/10.1016/s0896-6273\(00\)80475-4](https://doi.org/10.1016/s0896-6273(00)80475-4)
- Lang, P. J. (1994). The varieties of emotional experience: a meditation on James-Lange theory. *Psychological Review*, 101(2), 211-221. <https://doi.org/10.1037/0033-295x.101.2.211>

- Lange, C. G. (1912). The mechanism of the emotions (B. Rand, Ed. & Trans). In *The classical psychologists*. (pp. 672-684). Houghton Mifflin. <https://www.sapili.org/subir-depois/en/ps000132.pdf> (Original work published in 1885)
- Lazarus, R. S. (1982). Thoughts on the relations between emotion and cognition. *American Psychologist*, 37(9), 1019-1024. <https://doi.org/10.1037/0003-066x.37.9.1019>
- Lazarus, R. S. (1984). On the primacy of cognition. *American Psychologist*, 39(2), 124-129. <https://doi.org/10.1037/0003-066x.39.2.124>
- Lazarus, R. S. (1991). *Emotion and adaptation* (1st ed.). Oxford University Press.
- LeDoux, J. E. (1996). *The emotional brain: The mysterious underpinnings of emotional life*. Simon & Schuster.
- LeDoux, J. E. (2000). Emotion circuits in the brain. *Annual Review of Neuroscience*, 23, 155-184. <https://doi.org/10.1146/annurev.neuro.23.1.155>
- LeDoux, J. E. (2012). Rethinking the emotional brain. *Neuron*, 73(4), 653-676. <https://doi.org/10.1016/j.neuron.2012.02.004>
- LeDoux, J. E. (2017). Semantics, surplus meaning, and the science of fear. *Trends in Cognitive Sciences*, 21(5), 303-306. <https://doi.org/10.1016/j.tics.2017.02.004>
- LeDoux, J. E. (2019). *The deep history of ourselves: The four-billion-year story of how we got conscious brains*. Viking.
- LeDoux, J. E. (2020). Thoughtful feelings. *Current Biology*, 30(11), R619-R623. <https://doi.org/10.1016/j.cub.2020.04.012>
- Lerner, J. S., Gonzalez, R. M., Small, D. A., & Fischhoff, B. (2003). Effects of fear and anger on perceived risks of terrorism: A national field experiment. *Psychological Science*, 14(2), 144-150. <https://doi.org/10.1111/1467-9280.01433>
- Lerner, J. S., & Keltner, D. (2000). Beyond valence: Toward a model of emotion-specific influences on judgement and choice. *Cognition & Emotion*, 14(4), 473-493. <https://doi.org/10.1080/026999300402763>
- Lerner, J. S., & Keltner, D. (2001). Fear, anger, and risk. *Journal of Personality and Social Psychology*, 81(1), 146-159. <https://doi.org/10.1037//0022-3514.81.1.146>
- Lerner, J. S., Li, Y., Valdesolo, P., & Kassam, K. S. (2015). Emotion and decision making. *Annual Review of Psychology*, 66, 799-823. <https://doi.org/10.1146/annurev-psych-010213-115043>

- Lerner, J. S., Small, D. A., & Loewenstein, G. (2004). Heart strings and purse strings: Carryover effects of emotions on economic decisions. *Psychological Science*, 15(5), 337-341. <https://doi.org/10.1111/j.0956-7976.2004.00679.x>
- Levenson, R. W. (1999). The intrapersonal functions of emotion. *Cognition and Emotion*, 13(5), 481-504. <https://doi.org/10.1080/026999399379159>
- Levenson, R. W. (2011). Basic emotion questions. *Emotion Review*, 3(4), 379-386. <https://doi.org/10.1177/1754073911410743>
- Leventhal, H., & Scherer, K. R. (1987). The relationship of emotion to cognition: A functional approach to a semantic controversy. *Cognition and Emotion*, 1(1), 3-28. <https://doi.org/10.1080/02699938708408361>
- Lieberman, M. D., & Eisenberger, N. I. (2009). Pains and pleasures of social life. *Science*, 323(5916), 890-891. <https://doi.org/10.1126/science.1170008>
- Loewenstein, G. (1987). Anticipation and the Valuation of Delayed Consumption. *Economic Journal*, 97(387), 666-684. <https://doi.org/10.2307/2232929>
- Loewenstein, G. (1996). Out of control: Visceral influences on behavior. *Organizational Behavior and Human Decision Processes*, 65(3), 272-292. <https://doi.org/10.1006/obhd.1996.0028>
- Loewenstein, G. (2000). Emotions in economic theory and economic behavior. *American Economic Review*, 90(2), 426-432. <https://doi.org/10.1257/aer.90.2.426>
- Loewenstein, G., O'Donoghue, T., & Rabin, M. (2003). Projection bias in predicting future utility. *Quarterly Journal of Economics*, 118(4), 1209-1248. <https://doi.org/10.1162/003355303322552784>
- Lugrin, B., Pelachaud, C., & Traum, D. (Eds.). (forthcoming). *Socially Interactive Agents* (Vol. 1 & 2). Association for Computing Machinery.
- Lutz, C., & White, G. M. (1986). The anthropology of emotions. *Annual Review of Anthropology*, 15, 405-436. <https://doi.org/10.1146/annurev.an.15.100186.002201>
- Lyubomirsky, S., King, L., & Diener, E. (2005). The benefits of frequent positive affect: does happiness lead to success? *Psychological Bulletin*, 131(6), 803-855. <https://doi.org/10.1037/0033-2909.131.6.803>
- Maclean, P. D. (1949). Psychosomatic disease and the "visceral brain"; recent developments bearing on the Papez theory of emotion. *Psychosomatic Medicine*, 11, 338-353. <https://doi.org/10.1097/00006842-194911000-00003>

- Maclean, P. D. (1952). Some Psychiatric Implications of Physiological Studies on Frontotemporal Portion of Limbic System (Visceral Brain). *Electroencephalography and Clinical Neurophysiology*, 4(4), 407-418. [https://doi.org/10.1016/0013-4694\(52\)90073-4](https://doi.org/10.1016/0013-4694(52)90073-4)
- Mandler, G. (1975). *Mind and emotion*. Wiley.
- Manstead, A. S. R., Frijda, N. H., & Fischer, A. H. (Eds.). (2004). *Feelings and emotions: The Amsterdam symposium*. Cambridge University Press.
- Markus, H. R., & Kitayama, S. (1991). Culture and the self: Implications for cognition, emotion, and motivation. *Psychological Review*, 98(2), 224-253. <https://doi.org/10.1037/0033-295x.98.2.224>
- Maroney, T. A., & Gross, J. J. (2014). The ideal of the dispassionate judge: An emotion regulation perspective. *Emotion Review*, 6(2), 142-151. <https://doi.org/10.1177/1754073913491989>
- Matsumoto, D. (1989). Cultural influences on the perception of emotion. *Journal of Cross-Cultural Psychology*, 20(1), 92-105. <https://doi.org/10.1177/0022022189201006>
- Matsumoto, D., Yoo, S. H., Nakagawa, S., & members of the Multinational Study of Cultural Display, R. (2008). Culture, emotion regulation, and adjustment. *Journal of Personality and Social Psychology*, 94(6), 925-937. <https://doi.org/10.1037/0022-3514.94.6.925>
- McGaugh, J. L. (2006). Make mild moments memorable: Add a little arousal. *Trends in Cognitive Sciences*, 10(8), 345-347. <https://doi.org/10.1016/j.tics.2006.06.001>
- Mesquita, B., & Frijda, N. H. (1992). Cultural variations in emotions: a review. *Psychological Bulletin*, 112(2), 179-204. <https://doi.org/10.1037/0033-2909.112.2.179>
- Mineka, S., & Ohman, A. (2002). Phobias and preparedness: The selective, automatic, and encapsulated nature of fear. *Biological Psychiatry*, 52(10), 927-937. [https://doi.org/10.1016/s0006-3223\(02\)01669-4](https://doi.org/10.1016/s0006-3223(02)01669-4)
- Mischel, W., & Shoda, Y. (1995). A cognitive-affective system theory of personality: reconceptualizing situations, dispositions, dynamics, and invariance in personality structure. *Psychological Review*, 102(2), 246-268. <https://doi.org/10.1037/0033-295x.102.2.246>
- Moors, A. (2009). Theories of emotion causation: A review. *Cognition and Emotion*, 23(4), 625-662. <https://doi.org/10.1080/02699930802645739>
- Moors, A. (2017). Integration of two skeptical emotion theories: Dimensional appraisal theory and Russell's psychological construction theory. *Psychological Inquiry*, 28(1), 1-19. <https://doi.org/10.1080/1047840x.2017.1235900>

- Moors, A., Ellsworth, P. C., Scherer, K. R., & Frijda, N. H. (2013). Appraisal theories of emotion: State of the art and future development. *Emotion Review*, 5(2), 119-124. <https://doi.org/10.1177/1754073912468165>
- Morris, J. S., Frith, C. D., Perrett, D. I., Rowland, D., Young, A. W., Calder, A. J., & Dolan, R. J. (1996). A differential neural response in the human amygdala to fearful and happy facial expressions. *Nature*, 383(6603), 812-815. <https://doi.org/10.1038/383812a0>
- Murphy, S. T., & Zajonc, R. B. (1993). Affect, cognition, and awareness: affective priming with optimal and suboptimal stimulus exposures. *Journal of Personality and Social Psychology*, 64(5), 723-739. <https://doi.org/10.1037//0022-3514.64.5.723>
- Nader, K., Schafe, G. E., & Le Doux, J. E. (2000). Fear memories require protein synthesis in the amygdala for reconsolidation after retrieval. *Nature*, 406(6797), 722-726. <https://doi.org/10.1038/35021052>
- Niedenthal, P. M. (2007). Embodying emotion. *Science*, 316(5827), 1002-1005. <https://doi.org/10.1126/science.1136930>
- Nummenmaa, L., Glerean, E., Hari, R., & Hietanen, J. K. (2014). Bodily maps of emotions. *Proceedings of the National Academy of Sciences of the United States of America*, 111(2), 646-651. <https://doi.org/10.1073/pnas.1321664111>
- Ochsner, K. N., & Gross, J. J. (2005). The cognitive control of emotion. *Trends in Cognitive Sciences*, 9(5), 242-249. <https://doi.org/10.1016/j.tics.2005.03.010>
- Öhman, A. (1986). Face the beast and fear the face: Animal and social fears as prototypes for evolutionary analyses of emotion. *Psychophysiology*, 23(2), 123-145. <https://doi.org/10.1111/j.1469-8986.1986.tb00608.x>
- Öhman, A., Flykt, A., & Esteves, F. (2001). Emotion drives attention: detecting the snake in the grass. *Journal of Experimental Psychology: General*, 130(3), 466-478. <https://doi.org/10.1037//0096-3445.130.3.466>
- Öhman, A., & Mineka, S. (2001). Fears, phobias, and preparedness: Toward an evolved module of fear and fear learning. *Psychological Review*, 108(3), 483-522. <https://doi.org/10.1037//0033-295x.108.3.483>
- Olsson, A., & Phelps, E. A. (2007). Social learning of fear. *Nature Neuroscience*, 10(9), 1095-1102. <https://doi.org/10.1038/nn1968>
- Ortony, A., Clore, G. L., & Collins, A. (1988). *The cognitive structure of emotions*. Cambridge University Press.
- Ortony, A., & Turner, T. J. (1990). What's basic about basic emotions? *Psychological Review*, 97(3), 315-331. <https://doi.org/10.1037/0033-295x.97.3.315>

- Oviatt, S., Schuller, B., Cohen, P., Sonntag, D., Potamianos, G., & Krüger, A. (2019). *The handbook of multimodal-multisensor interfaces: Language processing, software, commercialization, and emerging direction* (Vol. 3). Association for Computing Machinery.
- Oviatt, S., Schuller, B., Phil, C., Sonntag, D., Potamianos, G., & Kruger, A. (2018). *The handbook of multimodal-multisensor interfaces: Signal processing, architectures, and detection of emotion and cognition* (Vol. 2). Association for Computing Machinery. <https://doi.org/10.1145/3107990>
- Panksepp, J. (1991). Affective neuroscience: A conceptual framework for the neurobiological study of emotions. In K. Strongman (Ed.), *International reviews of emotion research* (pp. 59-99). Wiley.
- Panksepp, J. (1998). *Affective neuroscience: The foundations of human and animal emotions* (1st ed.). Oxford University Press.
- Papez, J. W. (1937). A proposed mechanism of emotion. *Archives of Neurology and Psychiatry*, 38(4), 725-743. <https://doi.org/10.1001/archneurpsyc.1937.02260220069003>
- Parkinson, B., Fischer, A. H., & Manstead, A. S. R. (2005). *Emotion in social relations: Cultural, group, and interpersonal processes*. Psychology Press.
- Parkinson, B., & Manstead, A. S. R. (2015). Current emotion research in social psychology: Thinking about emotions and other people. *Emotion Review*, 7(4), 371-380. <https://doi.org/10.1177/1754073915590624>
- Parrott, W. G., & Schulkin, J. (1993). Neuropsychology and the cognitive nature of the emotions. *Cognition and Emotion*, 7(1), 43-59. <https://doi.org/10.1080/02699939308409175>
- Pavlidis, I., Ahmed, M. E., Dukes, D., & Sander, D. (2020). *Affectivism Manifesto Dataset* [Data set]. OSFHOME. <https://doi.org/10.17605/OSF.IO/2KTNV>
- Pekrun, R., Frenzel, A., Goetz, T., & Perry, R. P. (2007). The control–value theory of achievement emotions: An integrative approach to emotions in education. In P. A. Schutz & R. Pekrun (Eds.), *Emotion in education* (pp. 13-36). Academic Press.
- Peper, M., & Markowitsch, H. J. (2001). Pioneers of affective neuroscience and early concepts of the emotional brain. *Journal of the History of the Neurosciences*, 10(1), 58-66. <https://doi.org/10.1076/jhin.10.1.58.5628>

- Pessoa, L., & Adolphs, R. (2010). Emotion processing and the amygdala: from a 'low road' to 'many roads' of evaluating biological significance. *Nature Reviews Neuroscience*, 11(11), 773-782. <https://doi.org/10.1038/nrn2920>
- Phelps, E. A., & LeDoux, J. E. (2005). Contributions of the amygdala to emotion processing: From animal models to human behavior. *Neuron*, 48(2), 175-187. <https://doi.org/10.1016/j.neuron.2005.09.025>
- Picard, R. W. (2000). *Affective computing*. MIT press.
- Picard, R. W., Vyzas, E., & Healey, J. (2001). Toward machine emotional intelligence: Analysis of affective physiological state. *Ieee Transactions on Pattern Analysis and Machine Intelligence*, 23(10), 1175-1191. <https://doi.org/10.1109/34.954607>
- Plutchik, R. (1980). A general psychoevolutionary theory of emotion. In R. Plutchik & H. Kellerman (Eds.), *Emotion: Theory, research and experience, Theories of emotion* (Vol. 1, pp. 3–33). Academic Press. <https://doi.org/10.1016/B978-0-12-558701-3.50007-7>
- Pollak, S. D., Camras, L. A., & Cole, P. M. (2019). Progress in understanding the emergence of human emotion. *Developmental Psychology*, 55(9), 1801-1811. <https://doi.org/10.1037/dev0000789>
- Pollak, S. D., Camras, L. A., & Cole, P. M. (2019). Special Issue: New Perspectives on the Development of Human Emotion. *Developmental Psychology*.
- Pollak, S. D., Cicchetti, D., Hornung, K., & Reed, A. (2000). Recognizing emotion in faces: Developmental effects of child abuse and neglect. *Developmental Psychology*, 36(5), 679-688. <https://doi.org/10.1037//0012-1649.36.5.679>
- Posner, J., Russell, J. A., & Peterson, B. S. (2005). The circumplex model of affect: An integrative approach to affective neuroscience, cognitive development, and psychopathology. *Development and Psychopathology*, 17(3), 715-734. <https://doi.org/10.1017/s0954579405050340>
- Potts, C. (2007). The expressive dimension. *Theoretical Linguistics*, 33(2), 165-198. <https://doi.org/10.1515/tl.2007.011>
- Preston, S. D., & de Waal, F. B. (2002). Empathy: Its ultimate and proximate bases. *Behavioral and Brain Sciences*, 25(1), 1-20; discussion 20-71. <https://doi.org/10.1017/s0140525x02000018>
- Prinz, J. J. (2004). *Gut reactions: A perceptual theory of the emotions*. Oxford University Press.

- Pritzker, S. E., Fenigsen, J., & M., W. J. (Eds.). (2019). *The Routledge handbook of language and emotion*. Routledge.
- Reddy, V. (2008). *How infants know minds*. Harvard University Press.
- Reisenzein, R. (1983). The Schachter theory of emotion: two decades later. *Psychological Bulletin*, 94(2), 239-264. <https://doi.org/10.1037/0033-2909.94.2.239>
- Reschke, P. J., Walle, E. A., & Dukes, D. (2017). Interpersonal development in infancy: The interconnectedness of emotion understanding and social cognition. *Child Development Perspectives*, 11(3), 178-183. <https://doi.org/10.1111/cdep.12230>
- Reymert, M. L. (Ed.). (1928). Feelings and emotions: The Wittenberg symposium by thirty psychologists. *British Journal of Medical Psychology*, 10(3), 289–293. <https://doi.org/10.1111/j.2044-8341.1930.tb01028.x>
- Reymert, M. L. (Ed.). (1950). *Feelings and emotions: The Mooseheart symposium in cooperation with the University of Chicago*. McGraw-Hill.
- Roberts, R. C. (2003). *Emotions: An essay in aid of moral psychology*. Cambridge University Press.
- Rolls, E. T. (1996). *The brain and emotion*. Oxford University Press.
- Rosenwein, B. H., & Cristiani, R. (2018). *What is the history of emotions? (What is history?)* (1st ed.). Polity Press.
- Röttger-Rössler, B. (2018). Multiple Belongings. On the affective dimensions of migration. *Zeitschrift für Ethnologie*, 143: 237-262. <https://www.jstor.org/stable/26899773>
- Röttger-Rössler, B. & Slaby, J. (Eds.). (2018). *Affect in Relation. Families, Places, Technologies*. Routledge.
- Ruba, A. L., & Pollak, S. D. (2020). The development of emotion reasoning in infancy and early childhood. *Annual Review of Developmental Psychology*, 2, 503-531. <https://doi.org/10.1146/annurev-devpsych-060320-102556>
- Russell, J. A. (1980). A circumplex model of affect. *Journal of Personality and Social Psychology*, 39(6), 1161-1178. <https://doi.org/10.1037/h0077714>
- Russell, J. A. (2003). Core affect and the psychological construction of emotion. *Psychological Review*, 110(1), 145-172. <https://doi.org/10.1037/0033-295x.110.1.145>



- Saarimaki, H., Gotsopoulos, A., Jaaskelainen, I. P., Lampinen, J., Vuilleumier, P., Hari, R., Sams, M., & Nummenmaa, L. (2016). Discrete neural signatures of basic emotions. *Cerebral Cortex*, 26(6), 2563-2573. <https://doi.org/10.1093/cercor/bhv086>
- Sander, D., & Scherer, K. R. (Eds.). (2009). *The Oxford companion to emotion and the affective sciences*. Oxford University Press.
- Sander, D., Grafman, J., & Zalla, T. (2003). The human amygdala: An evolved system for relevance detection. *Reviews in the Neurosciences*, 14(4), 303-316. <https://doi.org/10.1515/revneuro.2003.14.4.303>
- Sander, D., Grandjean, D., & Scherer, K. R. (2005). A systems approach to appraisal mechanisms in emotion. *Neural Networks*, 18(4), 317-352. <https://doi.org/10.1016/j.neunet.2005.03.001>
- Scarantino, A. (Ed.). (forthcoming). *The Routledge handbook of emotion theory*. Routledge.
- Scarantino, A., & De Sousa, R. (2018). Emotion. In E. N. E. N. Zalta (Ed.), *Stanford encyclopedia of philosophy*. Stanford University. <https://plato.stanford.edu/archives/win2018/entries/emotion/>
- Schachter, S., & Singer, J. E. (1962). Cognitive, social, and physiological determinants of emotional state. *Psychological Review*, 69(5), 379-399. <https://doi.org/10.1037/h0046234>
- Scheff, T. J. (1988). Shame and conformity: The deference-emotion system. *American Sociological Review*, 53(3), 395-406. <https://doi.org/10.2307/2095647>
- Scherer, K. R. (2005). What are emotions? And how can they be measured? *Social Science Information sur les Sciences Sociales*, 44(4), 695-729. <https://doi.org/10.1177/0539018405058216>
- Scherer, K. R. (2009). Emotions are emergent processes: they require a dynamic computational architecture. *Philosophical Transactions of the Royal Society B-Biological Sciences*, 364(1535), 3459-3474. <https://doi.org/10.1098/rstb.2009.0141>
- Scherer, K. R. (2016). What are emotions? And how can they be measured? *Social Science Information*, 44(4), 695-729. <https://doi.org/10.1177/0539018405058216>
- Scherer, K. R., Banse, R., & Wallbott, H. G. (2001). Emotion inferences from vocal expression correlate across languages and cultures. *Journal of Cross-Cultural Psychology*, 32(1), 76-92. <https://doi.org/10.1177/0022022101032001009>
- Scherer, K. R., Bänziger, T., & Roesch, E. (Eds.). (2010). *A blueprint for affective computing: A sourcebook and manual*. Oxford University Press.

- Scherer, K. R., & Mehu, M. (2015). Normal and abnormal emotions—The quandary of diagnosing affective disorder: Introduction and overview. *Emotion Review*, 7(3), 201-203. <https://doi.org/10.1177/1754073915576689>
- Schiewer, G. L., Altarriba, J., & Ng, B. C. (Eds.). (forthcoming, due 2022). *Language and emotion: An international handbook* (Vol. 1). De Gruyter Mouton.
- Schneirla, T. C. (1959). An evolutionary and developmental theory of biphasic processes underlying approach and withdrawal. In M. R. Jones (Ed.), *Current theory and research in motivation* (pp. 1-49). University of Nebraska Press.
- Schore, A. N. (2015). *Affect regulation and the origin of the self: The neurobiology of emotional development*. Routledge.
- Schwarz, N., & Clore, G. L. (1983). Mood, misattribution, and judgments of well-being: Informative and directive functions of affective states. *Journal of Personality and Social Psychology*, 45(3), 513-523. <https://doi.org/10.1037/0022-3514.45.3.513>
- Sergerie, K., Chochol, C., & Armony, J. L. (2008). The role of the amygdala in emotional processing: A quantitative meta-analysis of functional neuroimaging studies. *Neuroscience and Biobehavioral Reviews*, 32(4), 811-830. <https://doi.org/10.1016/j.neubiorev.2007.12.002>
- Shott, S. (1979). Emotion and social-life: A symbolic interactionist analysis. *American Journal of Sociology*, 84(6), 1317-1334. <https://doi.org/10.1086/226936>
- Silvia, P. J. (2006). *Exploring the psychology of interest*. Oxford University Press.
- Simon, H. A. (1967). Motivational and emotional controls of cognition. *Psychological Review*, 74(1), 29-39. <https://doi.org/10.1037/h0024127>
- Singer, T., Seymour, B., O'Doherty, J., Kaube, H., Dolan, R. J., & Frith, C. D. (2004). Empathy for pain involves the affective but not sensory components of pain. *Science*, 303(5661), 1157-1162. <https://doi.org/10.1126/science.1093535>
- Slaby, J. & von Scheve, C. (Eds.). (2019). *Affective Societies. Key Concepts*. Routledge.
- Smith, C. A., & Ellsworth, P. C. (1985). Patterns of cognitive appraisal in emotion. *Journal of Personality and Social Psychology*, 48(4), 813-838. <https://doi.org/10.1037/0022-3514.48.4.813>
- Sorce, J. F., Emde, R. N., Campos, J., & Klinnert, M. D. (1985). Maternal emotional signaling - Its effect on the visual-cliff behavior of 1-year-olds. *Developmental Psychology*, 21(1), 195-200. <https://doi.org/10.1037/0012-1649.21.1.195>

- Sperber, D., & Wilson, D. (2015). Beyond speaker's meaning. *Croatian Journal of Philosophy*, 15(44), 117-149. <https://hrcak.srce.hr/file/246524>
- Sroufe, L. A. (1996). *Emotional development: The organization of emotional life in the early years*. Cambridge University Press.
- Stearns, P. N., & Stearns, C. Z. (1985). Emotionology: Clarifying the history of emotions and emotional standards. *American Historical Review*, 90(4), 813-836. <https://doi.org/10.2307/1858841>
- Stern, D. N. (1985). *The interpersonal world of the infant*. Basic Books.
- Stets, J. E., & Turner, J. H. (2008). The sociology of emotions. In M. Lewis, J. M. Haviland-Jones, & L. F. Barrett (Eds.), *Handbook of emotions* (3rd ed., pp. 32-46). Guilford.
- Stets, J. E., & Turner, J. H. (Eds.). (2014). *Handbook of the sociology of emotions (Vol. 2)*. Springer.
- Stieglitz, S., & Dang-Xuan, L. (2013). Emotions and information diffusion in social media-sentiment of microblogs and sharing behavior. *Journal of Management Information Systems*, 29(4), 217-247. <https://doi.org/10.2753/Mis0742-1222290408>
- Stodulka, T. (2019). A proposition – Affective dimensions of fieldwork and the empirical affect montage, *ISA eSymposium for Sociology*.
- Stodulka, T., Dinkelaker, S. & Thajib, F. (2019). *Affective dimensions of fieldwork and ethnography*. Springer.
- Szanto, T., & Landweer, H. (Eds.). (2020). *The Routledge handbook of phenomenology of emotion*. Routledge.
- Tappolet, C. (2016). *Emotions, values, and agency*. Oxford University Press.
- Thoits, P. A. (1989). The sociology of emotions. *Annual Review of Sociology*, 15, 317-342. <https://doi.org/10.1146/annurev.so.15.080189.001533>
- Thompson, R. A. (2019). Emotion dysregulation: A theme in search of definition. *Development and Psychopathology*, 31(3), 805-815. <https://doi.org/10.1017/s0954579419000282>
- Tomkins, S. S. (1962). *Affect imagery consciousness: The positive affects* (Vol. 1). Springer Publishing Company.
- Tomkins, S. S. (1962). *Affect imagery consciousness: The negative affects* (Vol. 2). Springer Publishing Company.

- Tooby, J., & Cosmides, L. (1990). The past explains the present: Emotional adaptations and the structure of ancestral environments. *Ethology and Sociobiology*, 11(4-5), 375-424. [https://doi.org/10.1016/0162-3095\(90\)90017-Z](https://doi.org/10.1016/0162-3095(90)90017-Z)
- Trevarthen, C., & Aitken, K. J. (2001). Infant intersubjectivity: Research, theory, and clinical applications. *Journal of Child Psychology and Psychiatry*, 42(1), 3-48. <https://doi.org/10.1017/s0021963001006552>
- Tronick, E. (2007). *The neurobehavioral and social-emotional development of infants and children*. W. W. Norton & Company.
- Tsai, J.L. (2007). Ideal affect: Cultural causes and behavioral consequences. *Perspectives on Psychological Science*, 2, 242-259. <https://doi.org/10.1111/j.1745-6916.2007.00043.x>
- Tsai, J. L., Knutson, B., & Fung, H. H. (2006). Cultural variation in affect valuation. *Journal of Personality and Social Psychology*, 90(2), 288-307. <https://doi.org/10.1037/0022-3514.90.2.288>
- Tsai, J. L., & Levenson, R. W. (1997). Cultural influences on emotional responding: Chinese American and European American dating couples during interpersonal conflict. *Journal of Cross-Cultural Psychology*, 28(5), 600-625. <https://doi.org/10.1177/0022022197285006>
- Tsai, J.L., Levenson, R.W., & McCoy, K. (2006). Cultural and temperamental variation in emotional response. *Emotion*, 6, 484-497. <https://doi.org/10.1037/1528-3542.6.3.484>
- Turner, J. H., & Stets, J. E. (2005). *The sociology of emotions*. Cambridge University Press.
- Vaccaro, A., Kaplan, J., & Damasio, A. (2020). Bittersweet: The Neuroscience of Ambivalent Affect. *Perspectives of Psychological Science*. 15(5), 1187-1199. <https://doi.org/10.1177/1745691620927708>
- Van Kleef, G. A., De Dreu, C. K. W., & Manstead, A. S. R. (2010). An interpersonal approach to emotion in social decision making. In M. P. Zanna (Ed.), *Advances in experimental social psychology* (Vol. 42, pp. 45-96). [https://doi.org/10.1016/s0065-2601\(10\)42002-x](https://doi.org/10.1016/s0065-2601(10)42002-x)
- Vuilleumier, P. (2005). How brains beware: neural mechanisms of emotional attention. *Trends in Cognitive Sciences*, 9(12), 585-594. <https://doi.org/10.1016/j.tics.2005.10.011>
- Vuilleumier, P., Armony, J. L., Driver, J., & Dolan, R. J. (2003). Distinct spatial frequency sensitivities for processing faces and emotional expressions. *Nature Neuroscience*, 6(6), 624-631. <https://doi.org/10.1038/nn1057>

- Weiner, B. (1985). An attributional theory of achievement motivation and emotion. *Psychological Review*, 92(4), 548-573. <https://doi.org/10.1037/0033-295x.92.4.548>
- Weiskrantz, L. (1956). Behavioral changes associated with ablation of the amygdaloid complex in monkeys. *Journal of Comparative and Physiological Psychology*, 49(4), 381–391. <https://doi.org/10.1037/h0088009>
- Weiss, H. M., & Cropanzano, R. (1996). Affective events theory: A theoretical discussion of the structure, causes and consequences of affective experiences at work. In B. M. Straw & L. L. Cummings (Eds.), *Research in Organizational Behavior* (Vol. 18, pp. 1-74). Elsevier Science/JAI Press.
- White, D. (2017). Affect: an introduction. *Cultural Anthropology*, 32(2), 175-180. <https://doi.org/10.14506/ca32.2.01>
- Wierzbicka, A. (1986). Human emotions: Universal or culture-specific? *American Anthropologist*, 88(3), 584-594. <https://doi.org/10.1525/aa.1986.88.3.02a00030>
- Wilson, T. D., & Gilbert, D. T. (2003). Affective forecasting. In M. P. Zanna (Ed.), *Advances in experimental social psychology*, (Vol. 35, pp. 345-411). Academic Press. [https://doi.org/10.1016/s0065-2601\(03\)01006-2](https://doi.org/10.1016/s0065-2601(03)01006-2)
- Zajonc, R. B. (1980). Feeling and thinking: Preferences need no inferences. *American Psychologist*, 35(2), 151–175. <https://doi.org/10.1037/0003-066X.35.2.151>
